# Supplementary material for: ctDNA dynamics: a novel indicator to track resistance in metastatic breast cancer treated with anti-HER2 therapy
Source: PubMed Central journal article supplement (PMC5323211; doi:10.18632/oncotarget.11791), 2016-09-01
Supplement: oncotarget-07-66020-s001.pdf [file oncotarget-07-66020-s001.pdf]

# ctDNA dynamics: a novel indicator to track resistance in metastatic breast cancer treated with anti-HER2 therapy

## SUPPLEMENTARY FIGURE AND TABLES

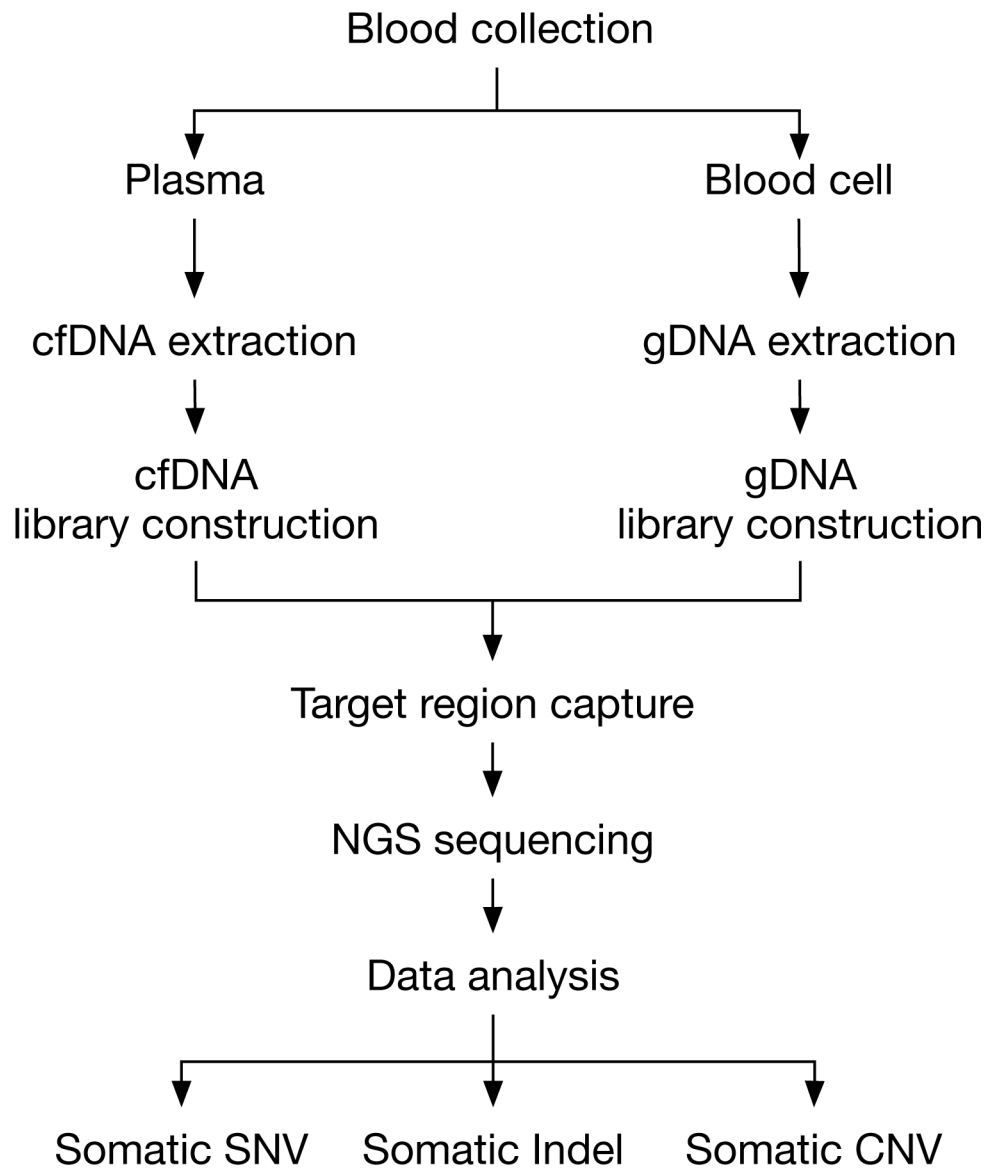

Supplementary Figure S1: Workflow of sample assay.

**Supplementary Table S1: Clinical characteristics of study population**

See Supplementary File 1

**Supplementary Table S2: List of target region genes**

See Supplementary File 1

**Supplementary Table S3: Detailed sequencing data for 18 patients**

See Supplementary File 1

**Supplementary Table S4: Somatic copy number variants (CNVs) identified in 52 plasma samples**

See Supplementary File 1

**Supplementary Table S5: Non-silent SNV and small indels identified in 52 plasma samples**

See Supplementary File 1
